# Supplementary material for: Bolaamphiphilic Bis-Dehydropeptide Hydrogels as Potential Drug Release Systems
Source: MDPI journal article supplement (doi:10.3390/gels7020052), 2021-04-29
Supplement: s1 [file s1]

Supplementary Information

**Bolaamphiphilic bis-dehydropeptide hydrogels as potential drug  
release systems**

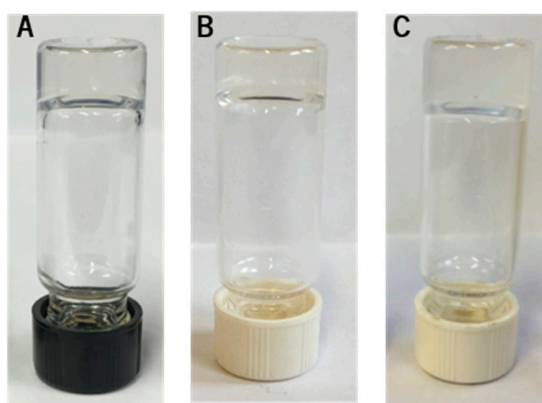

**Figure S1:** Optical images of hydrogels formed by hydrogelators **1** (A), **2** (B), **3** (C).

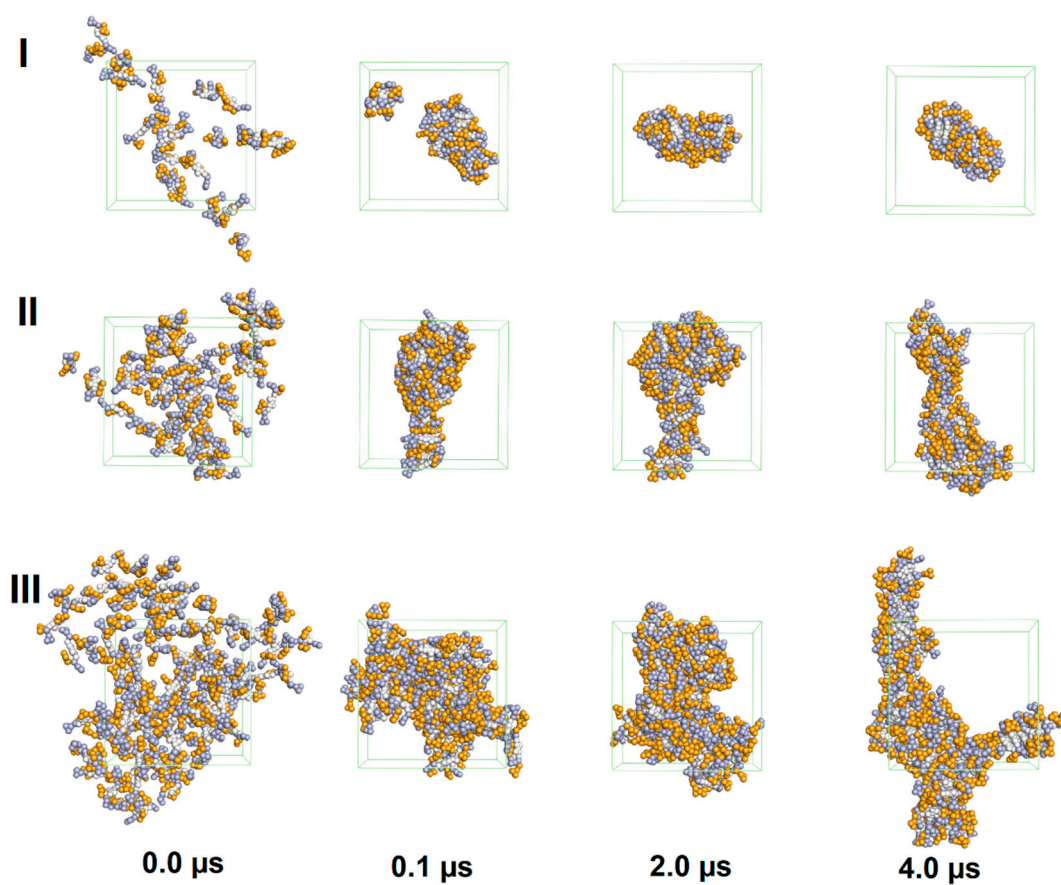

**Figure S2.** Snapshot at different time points of the self-assembly of compound **3** over a 4  $\mu$ s long CG MD simulation in different concentrations: (I) 0.08 M; (II) 0.16 M; (III) 0.32 M. Water beads are omitted. Color scheme: orange: dehydrophenylalanine; blue: phenylalanine; white: 2,6-naphthalenedicarboxyl.

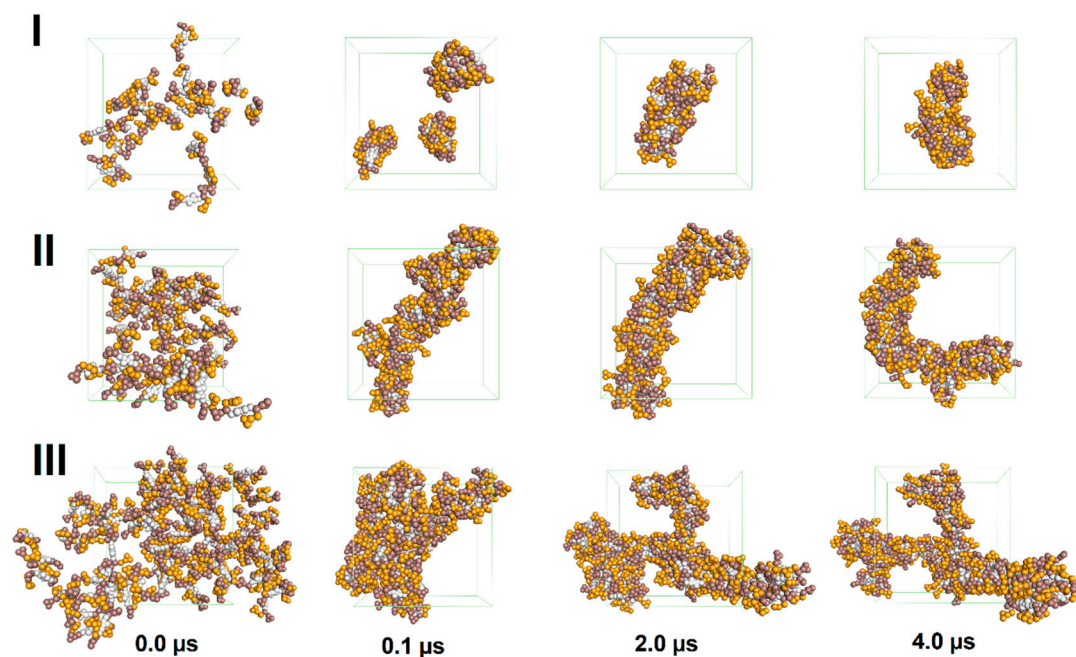

**Figure S3.** Snapshot at different time points of the self-assembly of compound **4** over a 4  $\mu\text{s}$  long CG MD simulation in different concentrations: (I) 0.08 M; (II) 0.16 M; (III) 0.32 M. Water beads are omitted. Color scheme: orange: dehydrophenylalanine; brown: tyrosine; white: 2,6-naphthalenedicarboxyl.

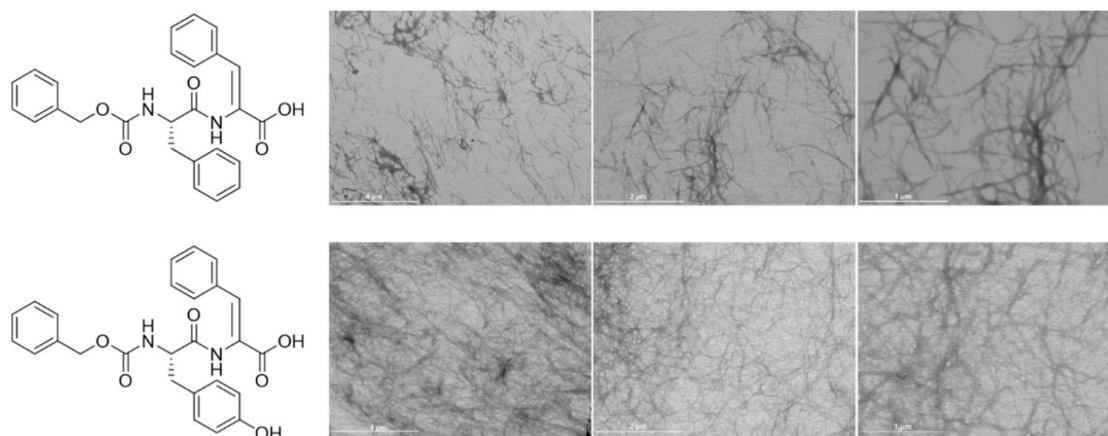

**Figure S4.** Scanning transmission electron microscopy (STEM) images of Cbz-Phe- $\Delta$ Phe-OH e Cbz-Tyr- $\Delta$ Phe-OH at 0.3 wt%, at different magnifications (4, 2 and 1  $\mu\text{m}$ ) [17].

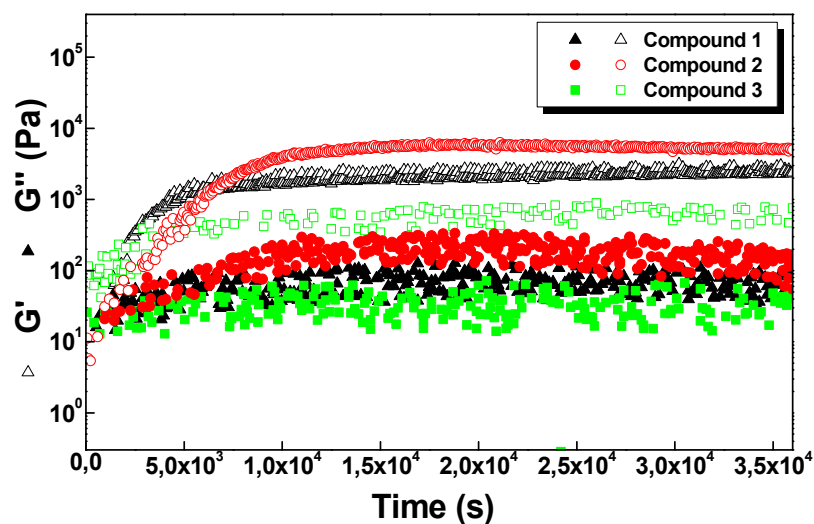

**Figure S5.** Elastic and viscous modulus during the kinetic process of gelation of compound 1, 2 and 3.

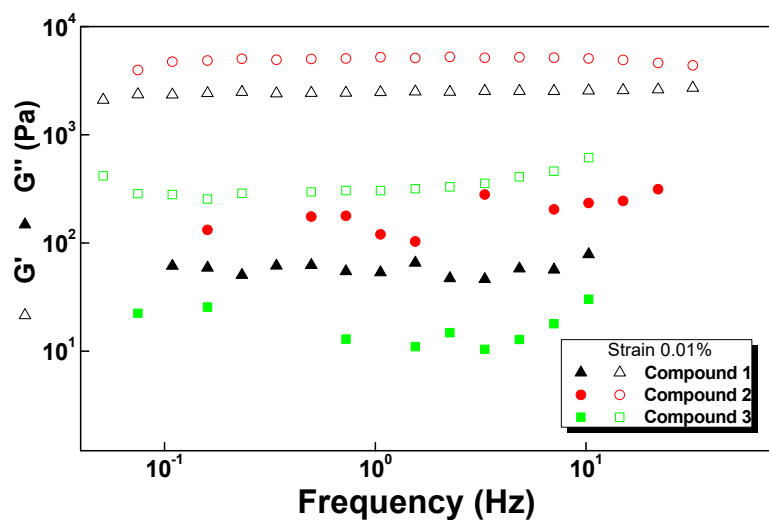

**Figure S6.** Frequency dependence of the shear elastic  $G'$  (empty symbols) and loss  $G''$  (filled symbols) moduli for the compounds 1, 2 and 3.

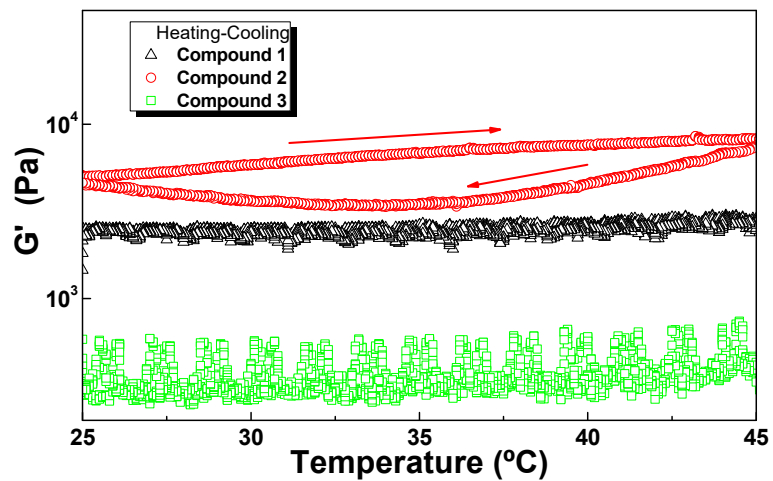

**Figure S7.** Thermal variation of the storage  $G'$  recorded at a frequency of 1 Hz with a strain amplitude of 0.005%, during a heating and cooling cycle performed at a rate of 1  $^{\circ}\text{C}/\text{min}$ .

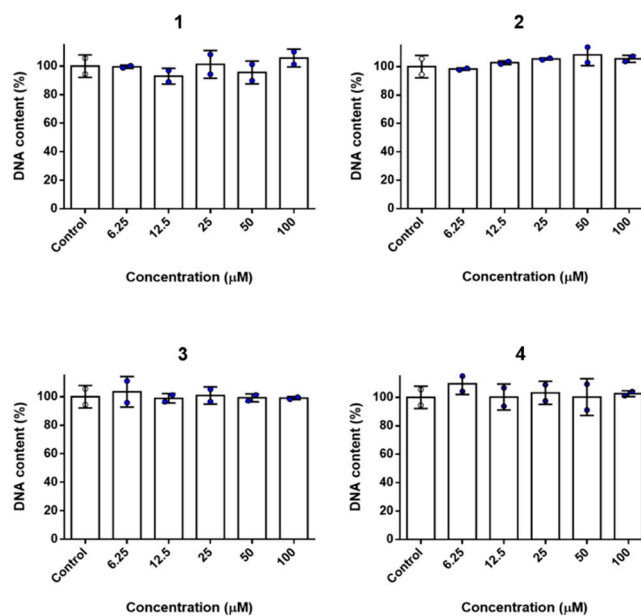

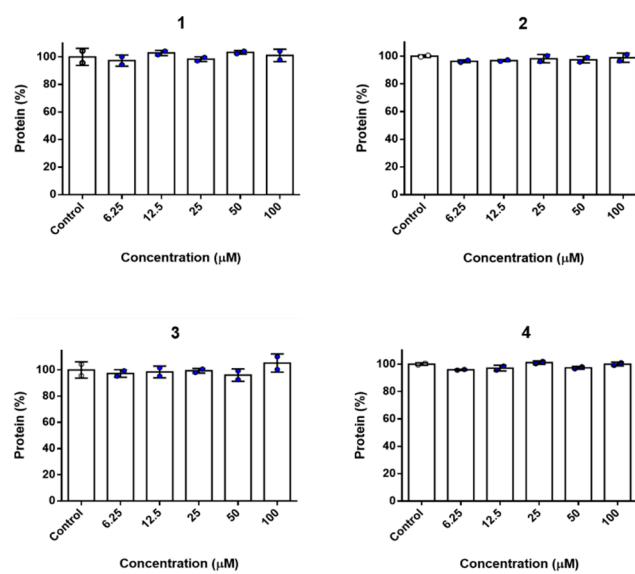

**Figure S8.** DNA and protein content of HaCaT cells in the same conditions as Figure 8.

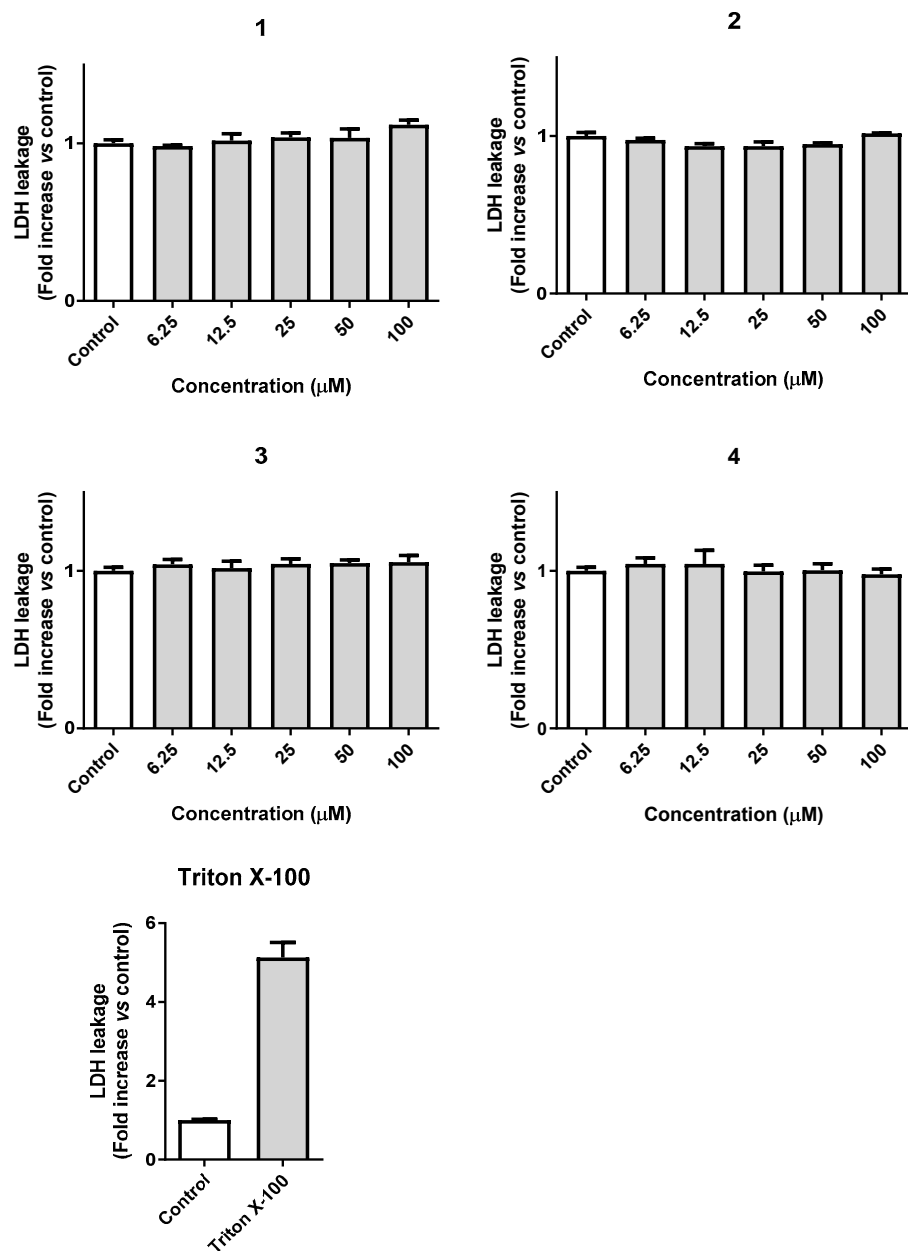

**Figure S9.** LDH activity found in the culture media of HaCaT cells treated with 1-4 for 24 h, at the concentrations presented. Triton X-100 was used as positive control to lyse cells.

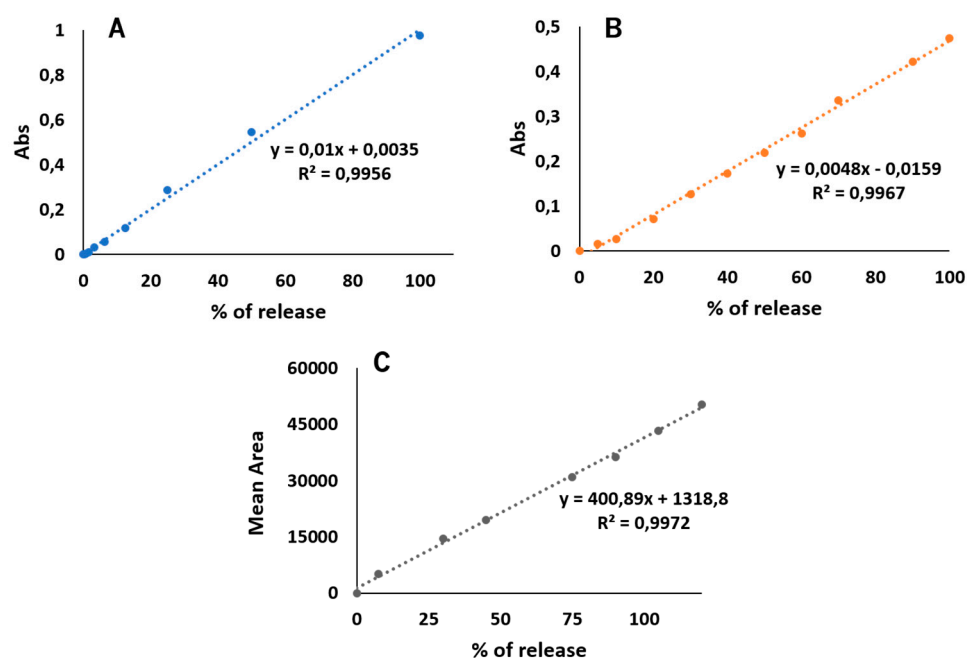

**Figure S10** Calibration curve to determine the amount of cargo in present in the layered solution above the hydrogel. **(A)** Methylene blue was measured by UV-Vis spectroscopy by absorbance at 666 nm. Equation of linear correlation:  $y=0.01x + 0.0035$ . **(B)** Methyl orange was measured by UV-Vis spectroscopy by absorbance at 465 nm. Equation of linear correlation:  $y=0.0048x - 0.0159$ . **(C)** Ciprofloxacin was measured by HPLC by area under the curve of the ciprofloxacin peak. Equation of linear correlation:  $y=400.89x + 1318.8$ .

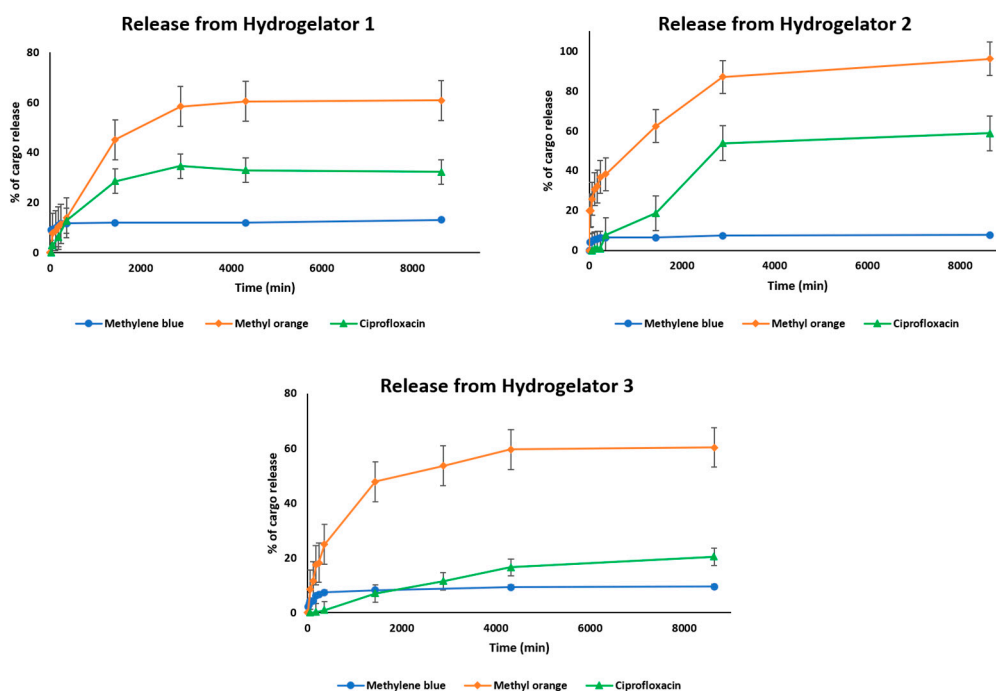

**Figure S11.** Percentage of cargo release vs time over 6 days. Release of methylene blue, methyl orange and ciprofloxacin from hydrogels of 1, 2 and 3.



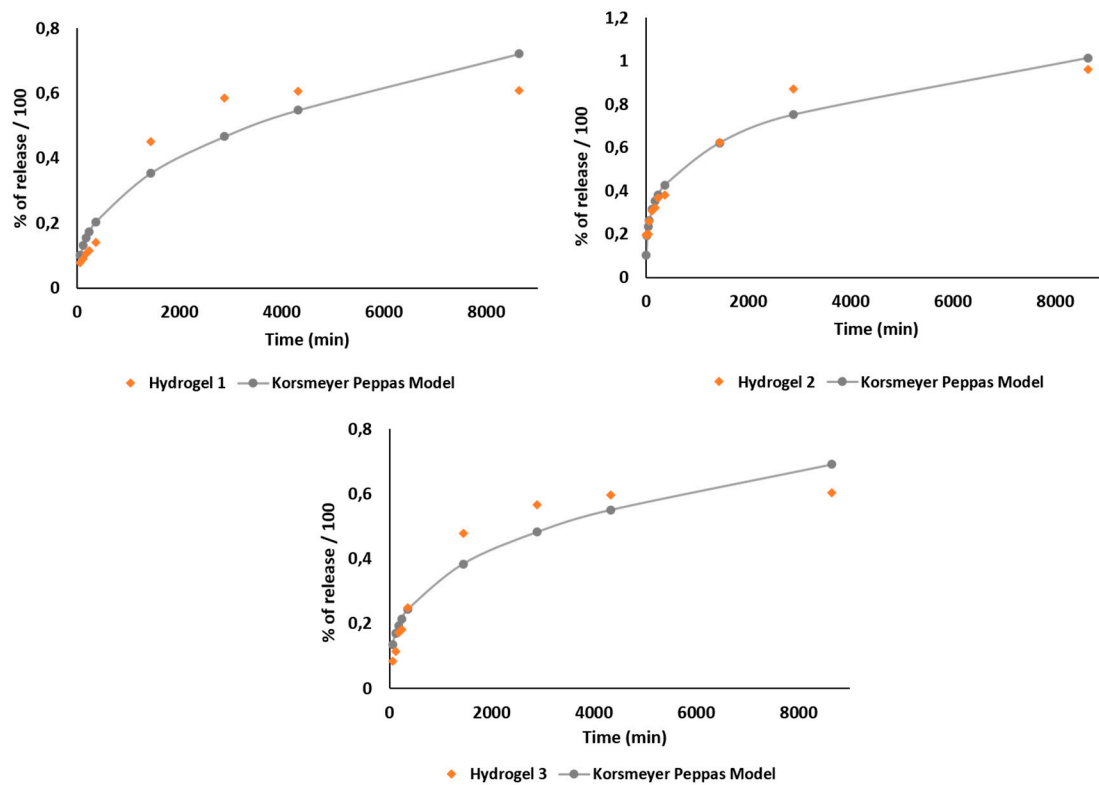

**Figure S12.** Data to Korsmeyer-Peppas Model to describe the release kinetics of methyl orange from hydrogels 1, 2 and 3.

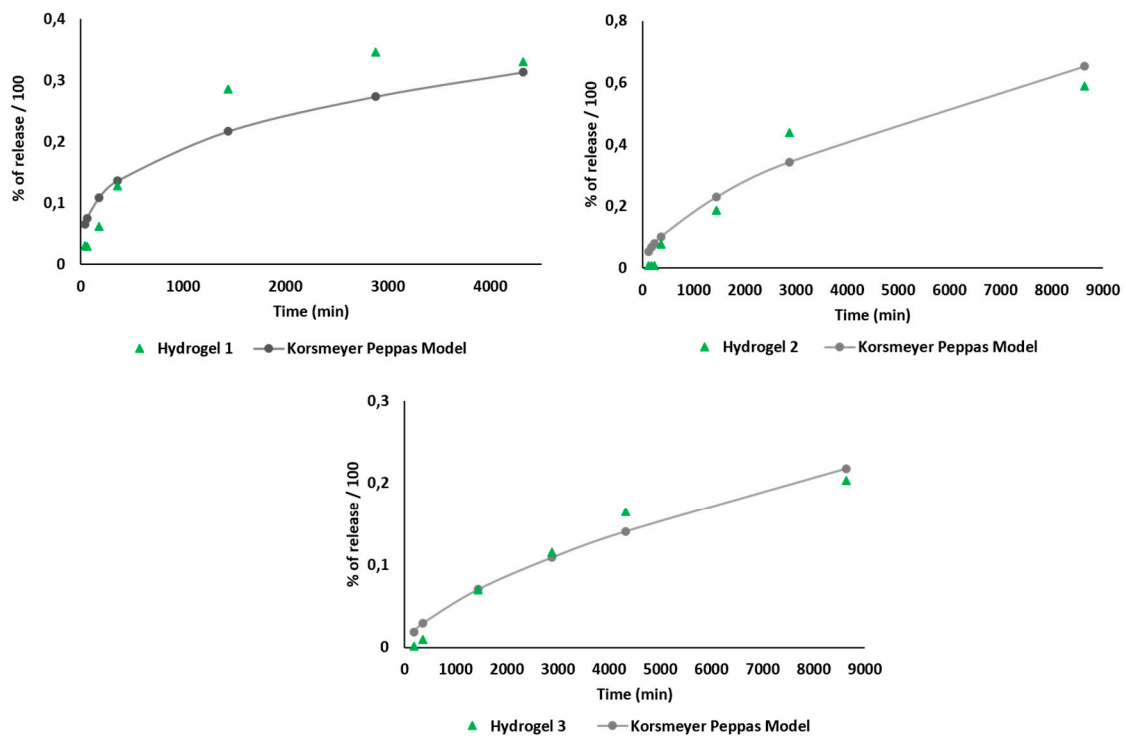

**Figure S13.** Data to Korsmeyer-Peppas Model to describe the release kinetics of ciprofloxacin from hydrogels 1, 2 and 3.

**Table S1.** Aggregation propensity score (AP) values obtained for the various simulations of compound **3** and **4**, and final SASA fraction of the dehydrophenylalanine ( $\Delta$ Phe), tyrosine (Tyr), phenylalanine (Phe) and 2,6-naphthalenedicarboxyl (Naph) groups.

|               | <b>3</b>  |             |            |                               | <b>4</b>  |             |            |                               |
|---------------|-----------|-------------|------------|-------------------------------|-----------|-------------|------------|-------------------------------|
|               | <b>AP</b> | <b>Naph</b> | <b>Phe</b> | <b><math>\Delta</math>Phe</b> | <b>AP</b> | <b>Naph</b> | <b>Tyr</b> | <b><math>\Delta</math>Phe</b> |
| <b>0.08 M</b> | 3.92      | 0.28        | 0.33       | 0.39                          | 3.72      | 0.26        | 0.36       | 0.38                          |
| <b>0.16 M</b> | 4.54      | 0.25        | 0.35       | 0.40                          | 4.04      | 0.22        | 0.35       | 0.43                          |
| <b>0.32 M</b> | 3.28      | 0.22        | 0.35       | 0.43                          | 3.15      | 0.21        | 0.34       | 0.45                          |
